# Supplementary material for: Y2BaZnO5:Er3+ microcapsules with enhanced upconversion by vanadium ion codoping
Source: Royal Society of Chemistry journal article supplement (doi:10.1039/c5ra26042f), 2016-01-01
Supplement: c5ra26042f1.pdf [file c5ra26042f1.pdf]

## **$\text{Y}_2\text{BaZnO}_5:\text{Er}^{3+}$ microcapsules with enhanced upconversion by vanadium ion codoping**

Hom Nath Luitel\*, Rumi Chand, Toshio Torikai, Mitsunori Yada, Takanori Watari<sup>#</sup>

### **Supplementary information**

Fig. S1

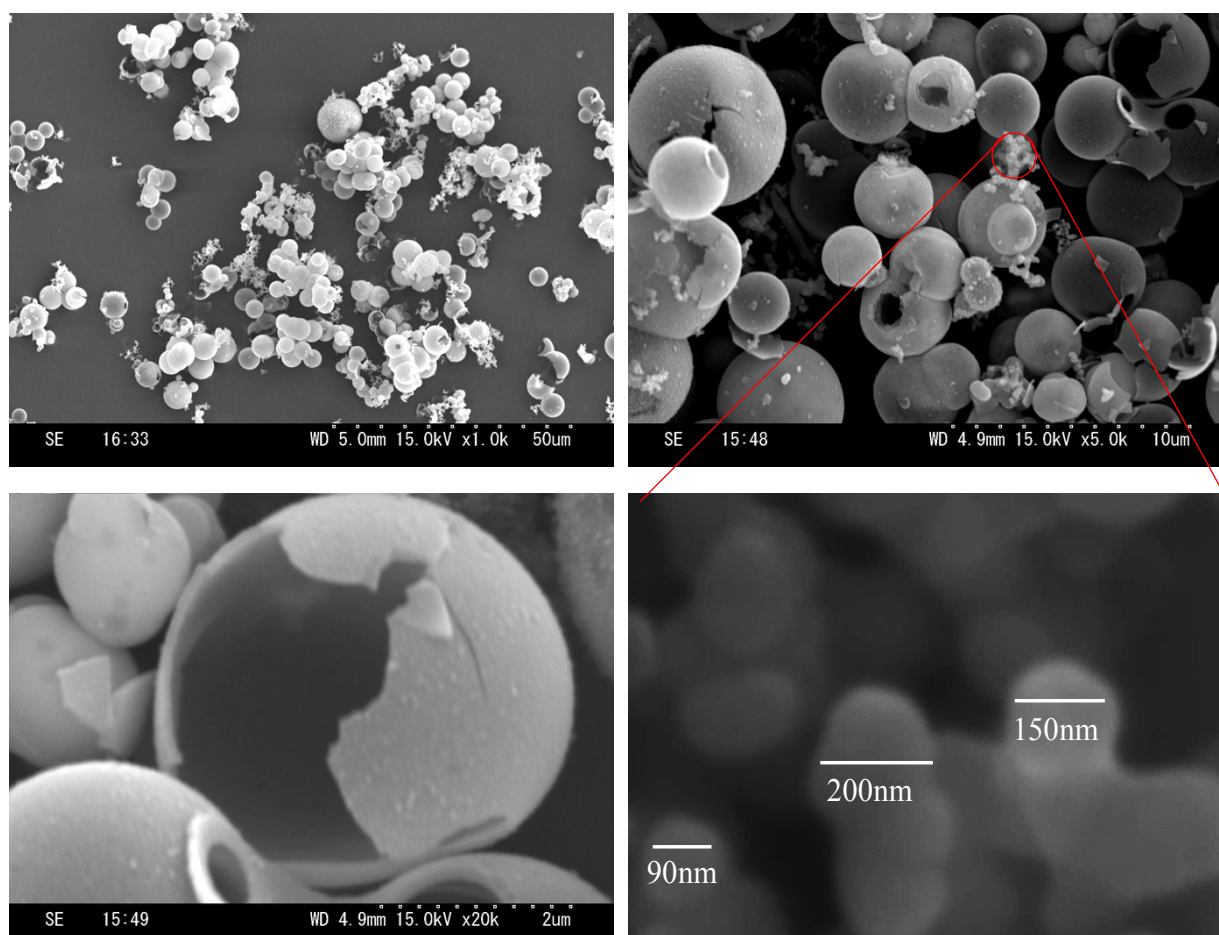

Fig. S1 SEM images of ' $\text{Y}_2\text{BaZnO}_5:0.03\text{Er}$ ' hollow spheres as prepared hydrothermally at 120 °C for 12 h and under different magnifications.

Fig. S2

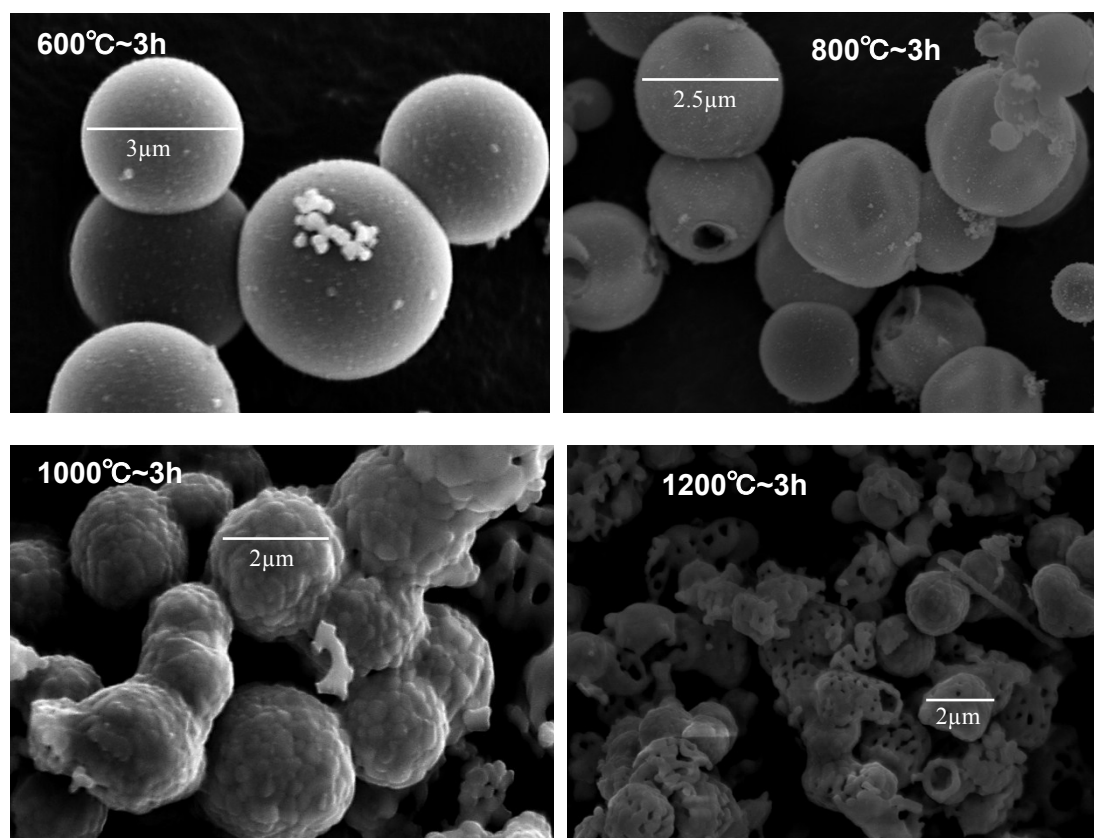

Fig. S2 SEM images of 'Y<sub>2</sub>BaZnO<sub>5</sub>:0.03Er' hollow shperes prepared hydrothermally at 120 °C for 12 h and heat treated at different temperatures.

Fig. S3

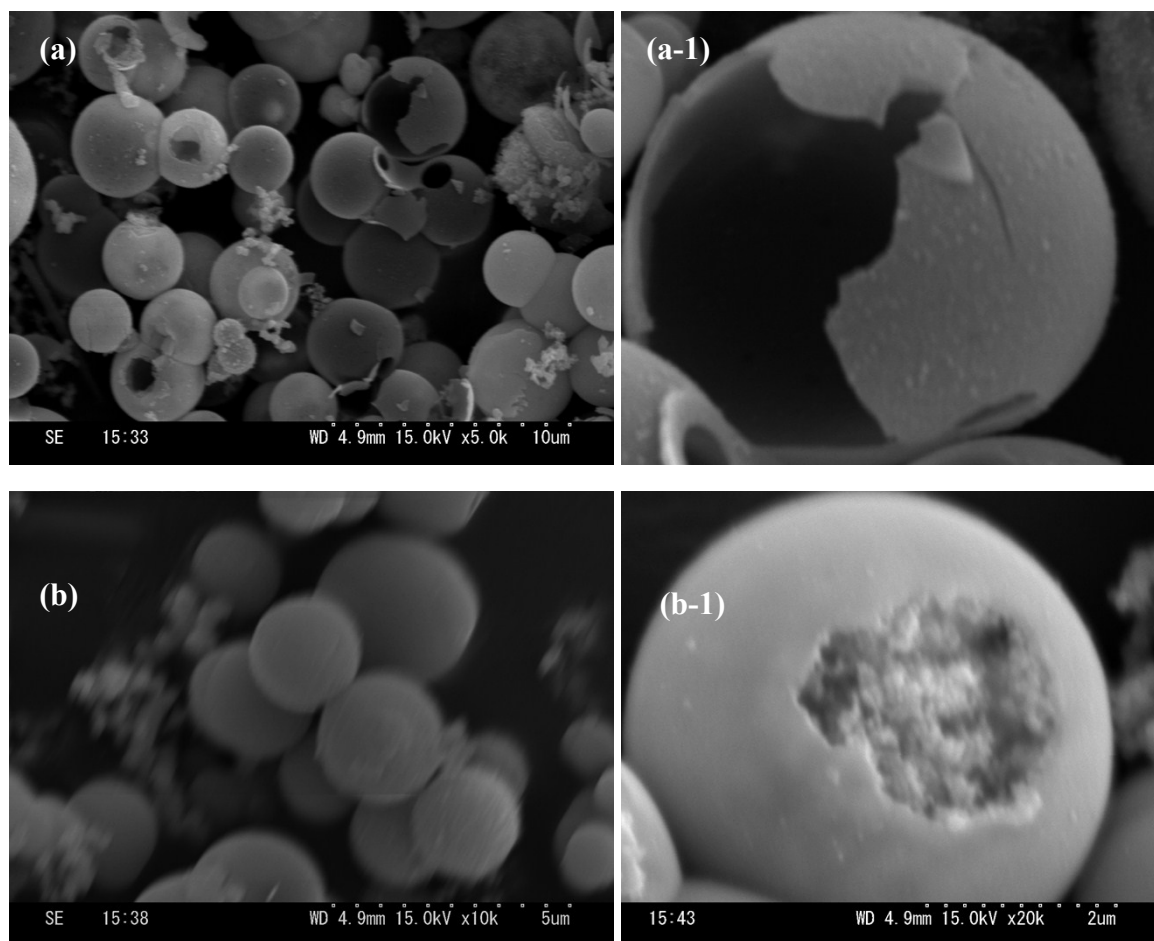

Fig. S3 SEM images of ‘Y<sub>2</sub>BaZnO<sub>5</sub>:0.03Er’ as prepared hydrothermally at 120 °C for 12 h: (a, a-1) under sufficient urea condition (metal ions to urea= 1 to 40) and (b, b-1) under low urea content (metal ions to urea= 1 to 4) to insure only precipitation to occur.

Fig. S4

Elemental composition of  $\text{Y}_2\text{BaZnO}_5:0.03\text{Er}$  (0.07Yb or 0.03V) samples measured by X-ray fluorescence spectroscopy (XRF)

| Sample                                            | Elemental composition (weight %) |              |              |                         |                         |      |
|---------------------------------------------------|----------------------------------|--------------|--------------|-------------------------|-------------------------|------|
|                                                   | $\text{Y}_2\text{O}_3$           | $\text{BaO}$ | $\text{ZnO}$ | $\text{Er}_2\text{O}_3$ | $\text{Yb}_2\text{O}_3$ |      |
| $\text{Y}_2\text{BaZnO}_5:0.03\text{Er}$ only     | 48.26                            | 33.12        | 17.51        | 1.11                    | 0.0003                  | 0    |
| $\text{Y}_2\text{BaZnO}_5:0.03\text{Er}$ , 0.07Yb | 46.37                            | 33.03        | 17.45        | 1.07                    | 2.13                    | 0    |
| $\text{Y}_2\text{BaZnO}_5:0.03\text{Er}$ , 0.03V  | 47.68                            | 33.15        | 17.72        | 1.11                    | 0.0002                  | 0.35 |

Elemental composition of each sample in pressed pellet form was measured three times at different positions and data were averaged.

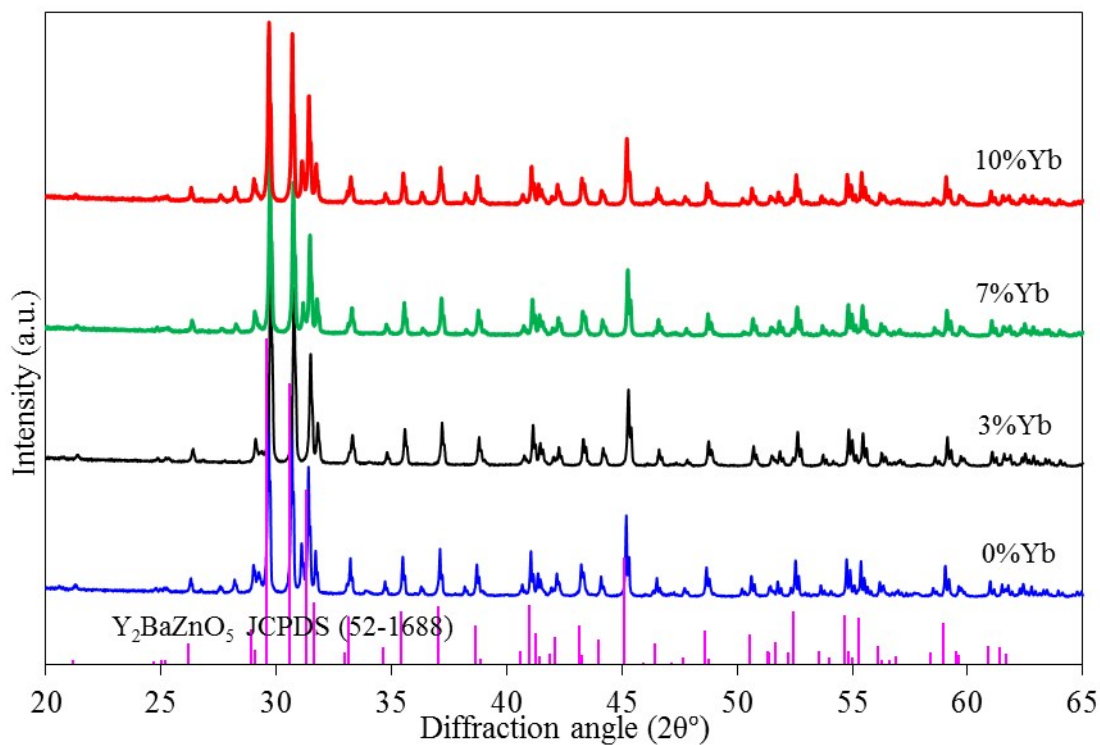

Fig.S5 XRD patterns of various moles of  $\text{Yb}^{3+}$  substituted  $\text{Y}_2\text{BaZnO}_5:0.03\text{Er}^{3+}$  phosphors
